# Supplementary material for: Concerted, highly asynchronous, enzyme-catalyzed [4 + 2] cycloaddition in the biosynthesis of spinosyn A; computational evidence
Source: Royal Society of Chemistry journal article supplement (doi:10.1039/c2ob25827g), 2012-01-01
Supplement: c2ob25827g.pdf [file c2ob25827g.pdf]

## ELECTRONIC SUPPLEMENTARY INFORMATION

# Concerted, highly asynchronous, enzyme-catalyzed [4+2] cycloaddition in the biosynthesis of spinosyn A; computational evidence

B. Andes Hess, Jr.<sup>1\*</sup> & Lidia Smentek<sup>1</sup>

Transition structure **9**, a conformer transition structure **6** was found, which by way of its IRC was shown to link **S1** with a Diels-Alder product (**S2**).

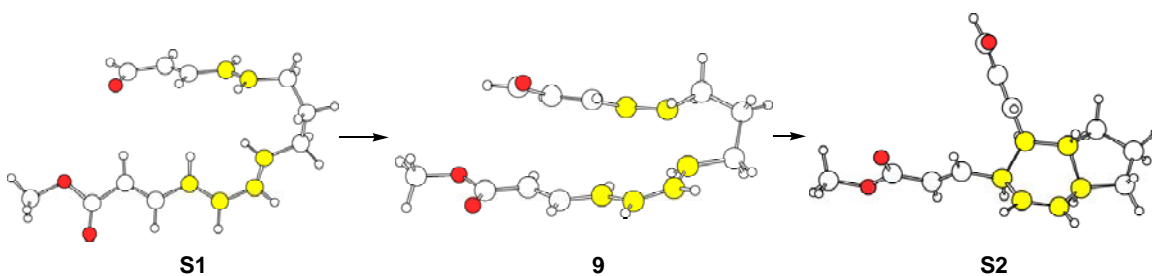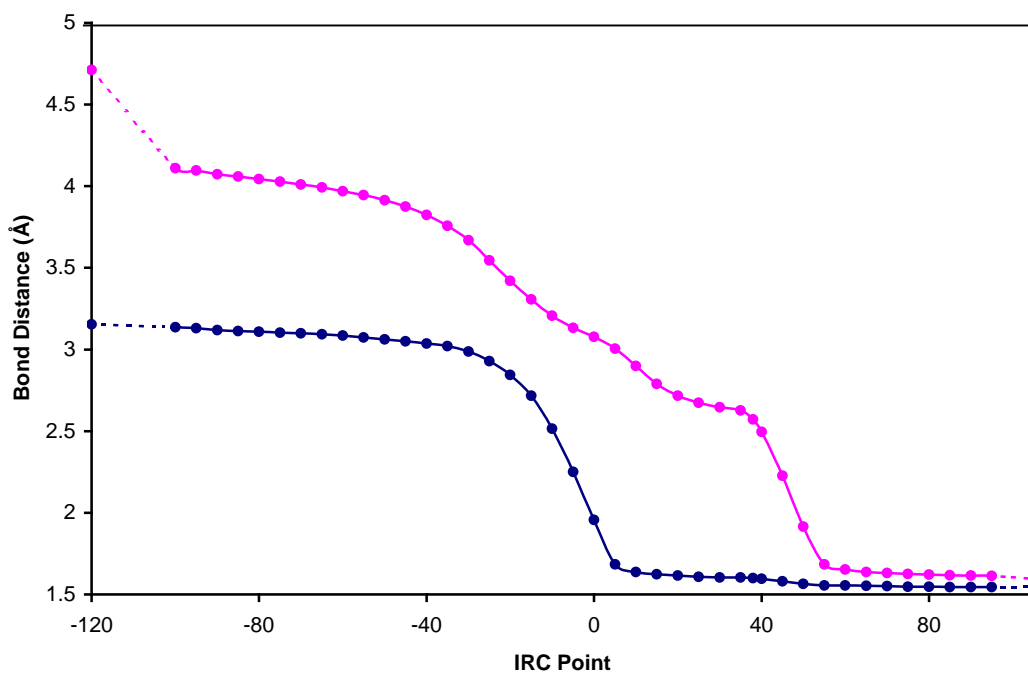

**Figure S1** | A plot of the bond distances of the two forming sigma bonds vs. the IRC point. Point 0 is the TS (**9**). The points at -120 and +120 reactant (**S1**) and product (**S2**) respectively.

<sup>1</sup> Department of Chemistry, Vanderbilt University, Nashville, Tennessee 37235, USA

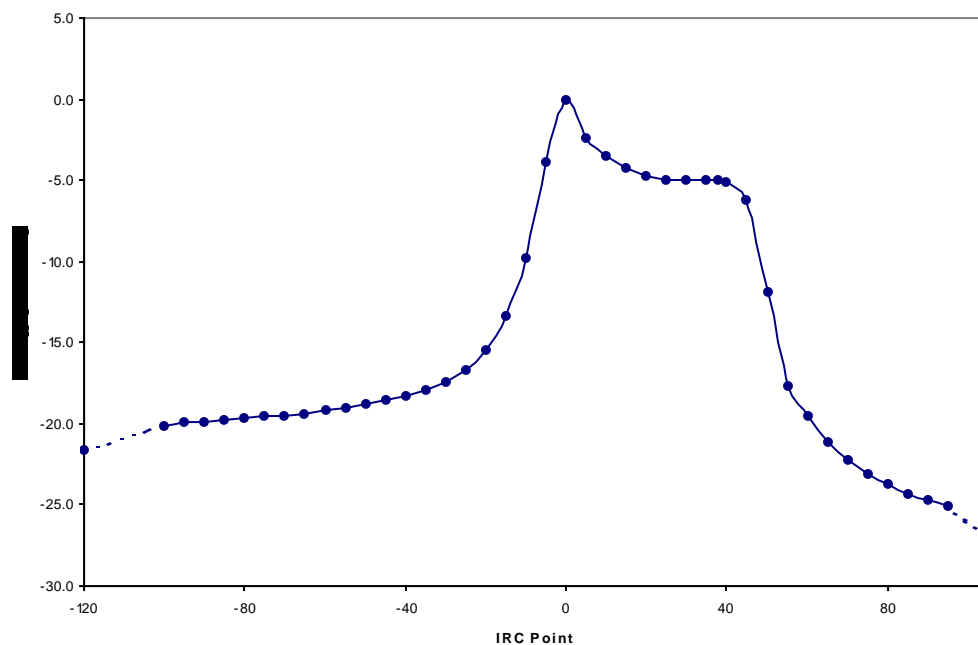

**Figure S2** | A plot of the energies of the IRC points. Point 0 is the TS (**9**). The points at -120 and +120 represent reactant (**S1**) and product (**S2**) respectively.

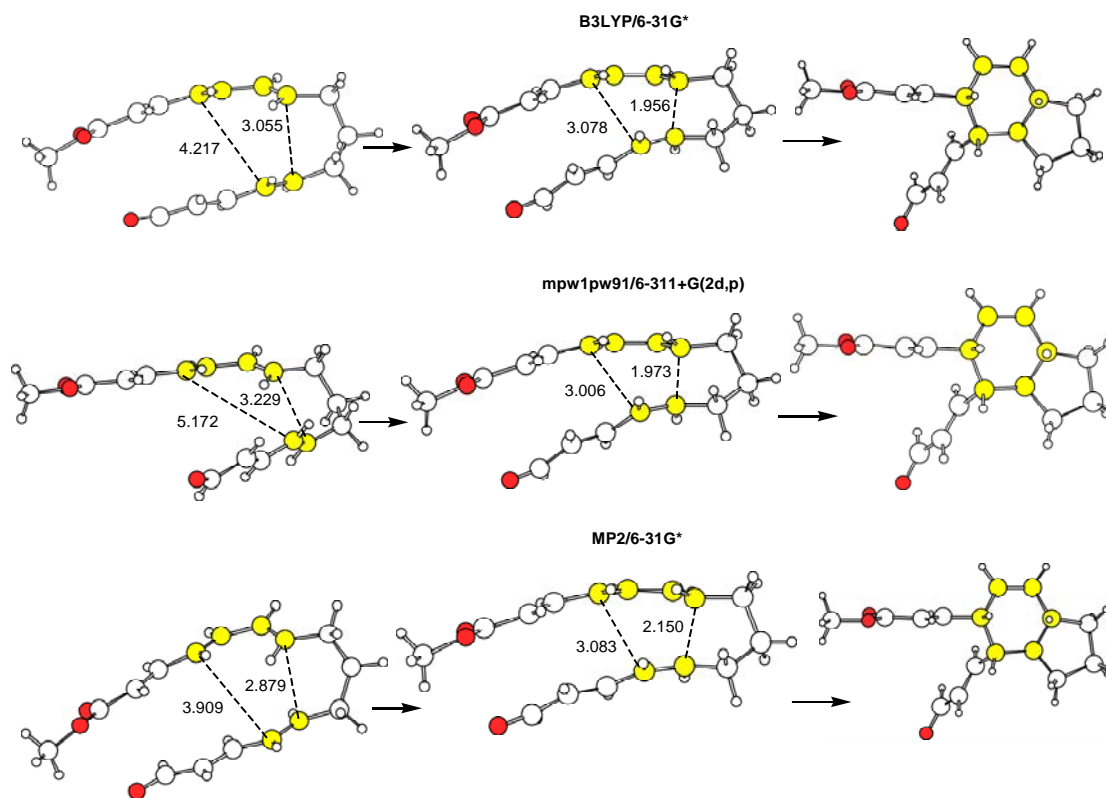

**Figure S3** | Optimized geometries of reactant (**S1**), transition structure (**9**) and product (**S2**). Bond distances are in Ångstroms

### 7 → 6 → 8 (energies)

|          | B3LYP       | with ZPE    | MPW <sup>1</sup> +ZPE | MPW          | with ZPE     | MP2          | with ZPE <sup>2</sup> |
|----------|-------------|-------------|-----------------------|--------------|--------------|--------------|-----------------------|
| reactant | -847.344683 | -847.018986 | -847.049883           | -847.377418  | -847.052321  | -844.615128  | -844.289157           |
| TS       | -847.311372 | -846.984846 | -847.018110           | -847.346858  | -847.020892  | -844.599140  | -844.272703           |
| product  | -847.354736 | -847.024206 | -847.069463           | -847.402078  | -847.071644  | -844.651564  | -844.232024           |
| Eact =   | <b>20.9</b> | <b>21.4</b> | <b>19.9</b>           | <b>19.2</b>  | <b>19.7</b>  | <b>10.0</b>  | <b>10.3</b>           |
| Ereact=  | <b>-6.3</b> | <b>-3.3</b> | <b>-12.3</b>          | <b>-15.5</b> | <b>-12.1</b> | <b>-22.9</b> | <b>-20.0</b>          |

<sup>1</sup>Single point at B3LYP geometry. <sup>2</sup>ZPE from B3LYP

### S1 → 9 → S2 (energies)

|          | B3LYP/6-31G* | with ZPE    | MPW <sup>1</sup> +ZPE |          |
|----------|--------------|-------------|-----------------------|----------|
| reactant | -847.343943  | -847.017972 | -847.046335           | a.u.     |
| TS       | -847.309580  | -846.983143 | -847.016091           | a.u.     |
| +product | -847.352544  | -847.022000 | -847.065781           | a.u.     |
| Eact =   | <b>21.6</b>  | <b>21.9</b> | <b>19.0</b>           | kcal/mol |
| Ereact=  | <b>-5.4</b>  | <b>-2.5</b> | <b>-12.2</b>          | kcal/mol |

<sup>1</sup>Single point at B3LYP geometry

### 13 → 12 → 14 (energies)

|          | B3LYP/6-31G* | with ZPE     | MPW <sup>1</sup> +ZPE |          |
|----------|--------------|--------------|-----------------------|----------|
| reactant | 1042.716885  | -1042.267200 | -1042.306021          | a.u.     |
| TS       | -1042.679490 | -1042.228935 | -1042.271610          | a.u.     |
| product  | -1042.721558 | -1042.266874 | -1042.320384          | a.u.     |
| Eact =   | <b>23.5</b>  | <b>24</b>    | <b>21.6</b>           | kcal/mol |
| Ereact=  | <b>-2.9</b>  | <b>0.2</b>   | <b>-9</b>             | kcal/mol |

<sup>1</sup>Single point at B3LYP geometry

## REACTANT DFT (7)

-----  
#6-31G\* B3LYP freq(noraman) nopop  
-----

|    |   |   |           |           |           |
|----|---|---|-----------|-----------|-----------|
| 1  | 6 | 0 | 2.315545  | -2.066701 | -0.477061 |
| 2  | 6 | 0 | -0.763487 | -1.797964 | -0.241153 |
| 3  | 6 | 0 | 1.436563  | -3.027066 | -0.131098 |
| 4  | 6 | 0 | 0.005988  | -2.862598 | 0.094709  |
| 5  | 6 | 0 | 3.672477  | 0.672729  | 0.662133  |
| 6  | 6 | 0 | 3.143295  | 1.683104  | -0.055688 |
| 7  | 6 | 0 | 4.878454  | -0.130150 | 0.271404  |
| 8  | 6 | 0 | 4.717584  | -1.663432 | 0.357628  |
| 9  | 6 | 0 | 3.782458  | -2.309016 | -0.693858 |
| 10 | 6 | 0 | 2.001368  | 2.460296  | 0.375749  |
| 11 | 6 | 0 | 1.448116  | 3.481565  | -0.316111 |
| 12 | 6 | 0 | 0.291700  | 4.215389  | 0.200925  |
| 13 | 8 | 0 | -0.250130 | 5.144384  | -0.372539 |
| 14 | 6 | 0 | -2.978694 | -0.692466 | -0.259232 |
| 15 | 6 | 0 | -2.172844 | -1.731476 | 0.050281  |
| 16 | 6 | 0 | -4.409745 | -0.724335 | 0.088451  |
| 17 | 8 | 0 | -4.988609 | -1.633459 | 0.656167  |
| 18 | 8 | 0 | -5.028283 | 0.416633  | -0.309925 |
| 19 | 6 | 0 | -6.429192 | 0.485759  | -0.013693 |
| 20 | 1 | 0 | 1.968654  | -1.041892 | -0.594666 |
| 21 | 1 | 0 | -0.322648 | -0.947943 | -0.760858 |
| 22 | 1 | 0 | 1.817065  | -4.038818 | 0.014375  |
| 23 | 1 | 0 | -0.490638 | -3.703373 | 0.579399  |
| 24 | 1 | 0 | 3.217691  | 0.421254  | 1.622516  |
| 25 | 1 | 0 | 3.587197  | 1.947794  | -1.015733 |
| 26 | 1 | 0 | 5.701319  | 0.147094  | 0.949495  |
| 27 | 1 | 0 | 5.204354  | 0.154458  | -0.737908 |
| 28 | 1 | 0 | 4.375751  | -1.942104 | 1.363288  |
| 29 | 1 | 0 | 5.714613  | -2.105723 | 0.236280  |
| 30 | 1 | 0 | 3.967803  | -3.390535 | -0.698950 |
| 31 | 1 | 0 | 4.073781  | -1.938601 | -1.689051 |
| 32 | 1 | 0 | 1.562580  | 2.190171  | 1.338532  |
| 33 | 1 | 0 | 1.840286  | 3.799176  | -1.280263 |
| 34 | 1 | 0 | -0.079586 | 3.860431  | 1.190022  |
| 35 | 1 | 0 | -2.607637 | 0.193075  | -0.767291 |
| 36 | 1 | 0 | -2.624640 | -2.581666 | 0.560501  |
| 37 | 1 | 0 | -6.761715 | 1.453839  | -0.390210 |
| 38 | 1 | 0 | -6.600088 | 0.413634  | 1.064168  |
| 39 | 1 | 0 | -6.969703 | -0.325453 | -0.509801 |

-----  
SCF Done: E(RB3LYP) = -847.344683209 A.U. after 15 cycles

Frequencies -- 11.0126 15.6022 29.5137

Zero-point correction= 0.325697 (Hartree/Particle)  
Thermal correction to Energy= 0.347099  
Thermal correction to Enthalpy= 0.348043  
Thermal correction to Gibbs Free Energy= 0.270245

Sum of electronic and zero-point Energies= -847.018987  
Sum of electronic and thermal Energies= -846.997584  
Sum of electronic and thermal Enthalpies= -846.996640  
Sum of electronic and thermal Free Energies= -847.074438  
Displacement 0.001103 0.001200 YES

SCF Done: E(RmPW1PW91) = **-847.375579884**

## TS DFT (6)

-----  
#6-31g\* b3lyp nopop freq(noraman) guess=read geom=check  
-----

-----  
1 6 0 3.496167 1.372180 0.016152  
2 6 0 0.553879 1.811842 -0.289710  
3 6 0 2.888777 2.096172 -1.040050  
4 6 0 1.511239 2.258747 -1.195310  
5 6 0 3.185289 -0.532248 -0.309398  
6 6 0 1.899464 -0.928976 0.134860  
7 6 0 4.426003 -0.978641 0.460055  
8 6 0 5.573521 -0.042022 0.081784  
9 6 0 5.018645 1.397059 0.184447  
10 6 0 0.815117 -1.277612 -0.693751  
11 6 0 -0.406526 -1.740426 -0.259609  
12 6 0 -1.449621 -2.128101 -1.193877  
13 8 0 -2.537402 -2.597724 -0.881596  
14 6 0 -1.692388 0.967550 0.163062  
15 6 0 -0.814947 1.656304 -0.618970  
16 6 0 -3.062520 0.676682 -0.301373  
17 8 0 -3.525675 1.009872 -1.377598  
18 8 0 -3.737197 -0.037894 0.624420  
19 6 0 -5.025300 -0.520235 0.208909  
20 1 0 2.963563 1.400881 0.964682  
21 1 0 0.861683 1.508837 0.707148  
22 1 0 3.525443 2.394826 -1.872302  
23 1 0 1.154094 2.667130 -2.140127  
24 1 0 3.319955 -0.586156 -1.391755  
25 1 0 1.753788 -1.032474 1.212194  
26 1 0 4.659144 -2.023980 0.220769  
27 1 0 4.225039 -0.935258 1.539117  
28 1 0 5.877586 -0.247846 -0.952645  
29 1 0 6.458914 -0.192119 0.708623  
30 1 0 5.479203 2.049241 -0.565750  
31 1 0 5.258642 1.826497 1.164507  
32 1 0 0.961815 -1.177070 -1.770949  
33 1 0 -0.606846 -1.898542 0.797809  
34 1 0 -1.193027 -1.964607 -2.266343  
35 1 0 -1.417626 0.617779 1.152555  
36 1 0 -1.161514 1.984925 -1.597779  
37 1 0 -5.440245 -1.027931 1.080242  
38 1 0 -4.904861 -1.221651 -0.619480  
39 1 0 -5.667693 0.309550 -0.097610  
-----

```
SCF Done: E(RB3LYP) = -847.311372168 A.U. after 1 cycles

Frequencies -- -422.5258 27.7151 54.8006
Zero-point correction= 0.326526 (Hartree/Particle)
Thermal correction to Energy= 0.345826
Thermal correction to Enthalpy= 0.346770
Thermal correction to Gibbs Free Energy= 0.278282
Sum of electronic and zero-point Energies= -846.984846
Sum of electronic and thermal Energies= -846.965546
Sum of electronic and thermal Enthalpies= -846.964602
Sum of electronic and thermal Free Energies= -847.033090

SCF Done: E(RmPW1PW91) = -847.344635917
```

## PRODUCT DFT (8)

```
-----
#6-31G* B3LYP FREQ(NORAMAN) GUESS=READ GEOM=CHECK nopop
-----
```

```
-----
1 6 0 3.127776 1.272992 0.282707
2 6 0 0.359196 0.985968 0.161920
3 6 0 2.368055 2.182131 -0.640798
4 6 0 1.045724 1.999774 -0.739941
5 6 0 2.666808 -0.183073 0.034486
6 6 0 1.146813 -0.399490 0.246116
7 6 0 3.646148 -1.008645 0.883276
8 6 0 4.996436 -0.236620 0.768124
9 6 0 4.655244 1.160167 0.161842
10 6 0 0.640299 -1.419337 -0.733621
11 6 0 0.182540 -2.643676 -0.427385
12 6 0 -0.247674 -3.583507 -1.472307
13 8 0 -0.653252 -4.710995 -1.259258
14 6 0 -2.110846 0.969574 0.664078
15 6 0 -1.091253 0.800640 -0.185628
16 6 0 -3.509011 0.766130 0.218928
17 8 0 -3.863028 0.465983 -0.904728
18 8 0 -4.370696 0.962153 1.246305
19 6 0 -5.757532 0.783699 0.922451
20 1 0 2.879810 1.526342 1.328833
21 1 0 0.405401 1.386582 1.185502
22 1 0 2.888884 2.928490 -1.237793
23 1 0 0.431769 2.599604 -1.408130
24 1 0 2.889311 -0.379499 -1.024706
25 1 0 0.972322 -0.785054 1.257970
26 1 0 3.723614 -2.049037 0.551271
27 1 0 3.305400 -1.029315 1.926673
28 1 0 5.707675 -0.772102 0.131086
29 1 0 5.471075 -0.138442 1.749867
30 1 0 4.942323 1.197285 -0.896804
31 1 0 5.181281 1.977845 0.665570
32 1 0 0.687464 -1.133933 -1.787697
33 1 0 0.113986 -2.992746 0.601259
-----
```

|    |   |   |           |           |           |
|----|---|---|-----------|-----------|-----------|
| 34 | 1 | 0 | -0.175858 | -3.187885 | -2.511545 |
| 35 | 1 | 0 | -1.958494 | 1.258322  | 1.700791  |
| 36 | 1 | 0 | -1.333272 | 0.513892  | -1.208548 |
| 37 | 1 | 0 | -6.301789 | 0.973352  | 1.848205  |
| 38 | 1 | 0 | -5.942088 | -0.234550 | 0.569332  |
| 39 | 1 | 0 | -6.064919 | 1.487941  | 0.144414  |

-----  
SCF Done: E(RB3LYP) = -847.354735632 A.U. after 1 cycles

Frequencies -- 15.5271 22.7259 37.3837

Zero-point correction= 0.330529 (Hartree/Particle)  
Thermal correction to Energy= 0.349548  
Thermal correction to Enthalpy= 0.350492  
Thermal correction to Gibbs Free Energy= 0.280133  
Sum of electronic and zero-point Energies= -847.024207  
Sum of electronic and thermal Energies= -847.005188  
Sum of electronic and thermal Enthalpies= -847.004243  
Sum of electronic and thermal Free Energies= -847.074603

SCF Done: E(RmPW1PW91) = -847.399992204

## REACTANT MPW (7)

-----  
#6-311+G(2d,p) mpw1pw91 nopop guess=read freq(noraman)  
-----

|    |   |   |           |           |           |
|----|---|---|-----------|-----------|-----------|
| 1  | 6 | 0 | 2.312279  | -2.063397 | -0.441268 |
| 2  | 6 | 0 | -0.742178 | -1.803442 | -0.255217 |
| 3  | 6 | 0 | 1.440768  | -3.014467 | -0.089390 |
| 4  | 6 | 0 | 0.023534  | -2.827737 | 0.162869  |
| 5  | 6 | 0 | 3.661938  | 0.665893  | 0.634493  |
| 6  | 6 | 0 | 3.095690  | 1.658766  | -0.061807 |
| 7  | 6 | 0 | 4.851355  | -0.120444 | 0.202656  |
| 8  | 6 | 0 | 4.713817  | -1.642071 | 0.316697  |
| 9  | 6 | 0 | 3.763232  | -2.307111 | -0.689205 |
| 10 | 6 | 0 | 1.962265  | 2.409060  | 0.412452  |
| 11 | 6 | 0 | 1.360636  | 3.406824  | -0.255651 |
| 12 | 6 | 0 | 0.213938  | 4.101554  | 0.312835  |
| 13 | 8 | 0 | -0.376791 | 5.006708  | -0.227856 |
| 14 | 6 | 0 | -2.932483 | -0.687961 | -0.314347 |
| 15 | 6 | 0 | -2.135156 | -1.694918 | 0.070300  |
| 16 | 6 | 0 | -4.347248 | -0.668430 | 0.073502  |
| 17 | 8 | 0 | -4.910815 | -1.501555 | 0.741206  |
| 18 | 8 | 0 | -4.964244 | 0.421534  | -0.417253 |
| 19 | 6 | 0 | -6.346132 | 0.531007  | -0.091015 |
| 20 | 1 | 0 | 1.964342  | -1.039594 | -0.538584 |
| 21 | 1 | 0 | -0.312243 | -1.021165 | -0.874399 |
| 22 | 1 | 0 | 1.814912  | -4.026386 | 0.048362  |
| 23 | 1 | 0 | -0.462265 | -3.611496 | 0.738679  |
| 24 | 1 | 0 | 3.245808  | 0.416074  | 1.609333  |
| 25 | 1 | 0 | 3.494478  | 1.923868  | -1.037873 |

|    |   |   |           |           |           |
|----|---|---|-----------|-----------|-----------|
| 26 | 1 | 0 | 5.693413  | 0.178584  | 0.839991  |
| 27 | 1 | 0 | 5.127969  | 0.156072  | -0.819037 |
| 28 | 1 | 0 | 4.406689  | -1.907631 | 1.332925  |
| 29 | 1 | 0 | 5.707640  | -2.074727 | 0.173719  |
| 30 | 1 | 0 | 3.947895  | -3.384552 | -0.681007 |
| 31 | 1 | 0 | 4.022895  | -1.955594 | -1.695688 |
| 32 | 1 | 0 | 1.568485  | 2.134914  | 1.389929  |
| 33 | 1 | 0 | 1.701700  | 3.731754  | -1.233082 |
| 34 | 1 | 0 | -0.102562 | 3.738057  | 1.313472  |
| 35 | 1 | 0 | -2.568448 | 0.136180  | -0.915748 |
| 36 | 1 | 0 | -2.578918 | -2.482759 | 0.673384  |
| 37 | 1 | 0 | -6.686781 | 1.453229  | -0.553959 |
| 38 | 1 | 0 | -6.481902 | 0.572800  | 0.989366  |
| 39 | 1 | 0 | -6.900510 | -0.321423 | -0.482849 |

-----  
SCF Done: E(RmPW1PW91) = -847.377417379 A.U. after 14 cycles

Frequencies -- 4.2476 11.1089 26.8683

Zero-point correction= 0.325097 (Hartree/Particle)  
Thermal correction to Energy= 0.346569  
Thermal correction to Enthalpy= 0.347513  
Thermal correction to Gibbs Free Energy= 0.268270  
Sum of electronic and zero-point Energies= -847.052320  
Sum of electronic and thermal Energies= -847.030848  
Sum of electronic and thermal Enthalpies= -847.029904  
Sum of electronic and thermal Free Energies= -847.109147

## TS MPW (6)

-----  
#6-311+G(2d,p) mpwlpw91 freq(noraman) guess=read geom=check nopop  
-----

|    |   |   |           |           |           |
|----|---|---|-----------|-----------|-----------|
| 1  | 6 | 0 | 3.482526  | 1.390014  | 0.018180  |
| 2  | 6 | 0 | 0.558178  | 1.728907  | -0.286530 |
| 3  | 6 | 0 | 2.867813  | 2.075601  | -1.036757 |
| 4  | 6 | 0 | 1.490295  | 2.195137  | -1.190297 |
| 5  | 6 | 0 | 3.190849  | -0.532800 | -0.312159 |
| 6  | 6 | 0 | 1.914291  | -0.924585 | 0.112264  |
| 7  | 6 | 0 | 4.416660  | -0.937115 | 0.478697  |
| 8  | 6 | 0 | 5.550224  | -0.002838 | 0.100574  |
| 9  | 6 | 0 | 4.989996  | 1.422825  | 0.186242  |
| 10 | 6 | 0 | 0.851580  | -1.288143 | -0.732223 |
| 11 | 6 | 0 | -0.344615 | -1.796965 | -0.317317 |
| 12 | 6 | 0 | -1.349757 | -2.213766 | -1.269666 |
| 13 | 8 | 0 | -2.400726 | -2.752077 | -0.986590 |
| 14 | 6 | 0 | -1.681953 | 0.898328  | 0.165459  |
| 15 | 6 | 0 | -0.808301 | 1.574240  | -0.610653 |
| 16 | 6 | 0 | -3.061152 | 0.660806  | -0.283797 |
| 17 | 8 | 0 | -3.517256 | 1.004713  | -1.347265 |
| 18 | 8 | 0 | -3.758232 | -0.002606 | 0.647496  |
| 19 | 6 | 0 | -5.082483 | -0.369863 | 0.266398  |



|    |   |   |           |           |           |
|----|---|---|-----------|-----------|-----------|
| 20 | 1 | 0 | 2.939943  | 1.384406  | 0.957133  |
| 21 | 1 | 0 | 0.870913  | 1.436745  | 0.709099  |
| 22 | 1 | 0 | 3.495033  | 2.388072  | -1.866757 |
| 23 | 1 | 0 | 1.119354  | 2.585195  | -2.133634 |
| 24 | 1 | 0 | 3.343250  | -0.572551 | -1.388874 |
| 25 | 1 | 0 | 1.756082  | -1.041841 | 1.183278  |
| 26 | 1 | 0 | 4.663618  | -1.980464 | 0.263587  |
| 27 | 1 | 0 | 4.198133  | -0.876349 | 1.549408  |
| 28 | 1 | 0 | 5.859691  | -0.215432 | -0.926682 |
| 29 | 1 | 0 | 6.430540  | -0.140435 | 0.730075  |
| 30 | 1 | 0 | 5.443570  | 2.069317  | -0.566966 |
| 31 | 1 | 0 | 5.223442  | 1.862066  | 1.159143  |
| 32 | 1 | 0 | 1.005618  | -1.171310 | -1.803646 |
| 33 | 1 | 0 | -0.549105 | -1.978676 | 0.732344  |
| 34 | 1 | 0 | -1.095904 | -2.007860 | -2.331544 |
| 35 | 1 | 0 | -1.407500 | 0.530858  | 1.145561  |
| 36 | 1 | 0 | -1.157963 | 1.916137  | -1.580753 |
| 37 | 1 | 0 | -5.509947 | -0.867313 | 1.132568  |
| 38 | 1 | 0 | -5.049788 | -1.049508 | -0.583809 |
| 39 | 1 | 0 | -5.663332 | 0.513692  | 0.003767  |

-----  
SCF Done: E(RmPW1PW91) = -847.346857843 A.U. after 2 cycles

Frequencies -- -433.4136 26.9705 34.7686

Zero-point correction= 0.325966 (Hartree/Particle)  
Thermal correction to Energy= 0.345399  
Thermal correction to Enthalpy= 0.346343  
Thermal correction to Gibbs Free Energy= 0.276926  
Sum of electronic and zero-point Energies= -847.020892  
Sum of electronic and thermal Energies= -847.001459  
Sum of electronic and thermal Enthalpies= -847.000515  
Sum of electronic and thermal Free Energies= -847.069932

## PRODUCT MPW (8)

-----  
#6-311+G(2d,p) mpw1pw91 nopop freq(noraman) guess=read geom=check  
-----

|    |   |   |           |           |           |
|----|---|---|-----------|-----------|-----------|
| 1  | 6 | 0 | 3.104094  | 1.261072  | 0.270039  |
| 2  | 6 | 0 | 0.366301  | 0.977277  | 0.143281  |
| 3  | 6 | 0 | 2.359823  | 2.148975  | -0.668732 |
| 4  | 6 | 0 | 1.045644  | 1.968750  | -0.769234 |
| 5  | 6 | 0 | 2.649322  | -0.186855 | 0.042551  |
| 6  | 6 | 0 | 1.138817  | -0.395903 | 0.236324  |
| 7  | 6 | 0 | 3.608321  | -0.989782 | 0.914623  |
| 8  | 6 | 0 | 4.950897  | -0.228474 | 0.799053  |
| 9  | 6 | 0 | 4.620552  | 1.145930  | 0.167390  |
| 10 | 6 | 0 | 0.642996  | -1.402518 | -0.746341 |
| 11 | 6 | 0 | 0.182529  | -2.618648 | -0.450420 |
| 12 | 6 | 0 | -0.235593 | -3.539727 | -1.505784 |
| 13 | 8 | 0 | -0.640760 | -4.660051 | -1.313609 |

|    |   |   |           |           |           |
|----|---|---|-----------|-----------|-----------|
| 14 | 6 | 0 | -2.080888 | 0.969451  | 0.664337  |
| 15 | 6 | 0 | -1.077508 | 0.791436  | -0.187874 |
| 16 | 6 | 0 | -3.476977 | 0.760464  | 0.236305  |
| 17 | 8 | 0 | -3.837191 | 0.455339  | -0.872064 |
| 18 | 8 | 0 | -4.323193 | 0.957755  | 1.260640  |
| 19 | 6 | 0 | -5.701949 | 0.771852  | 0.948806  |
| 20 | 1 | 0 | 2.843117  | 1.531412  | 1.305014  |
| 21 | 1 | 0 | 0.421803  | 1.392041  | 1.156861  |
| 22 | 1 | 0 | 2.880604  | 2.883579  | -1.273807 |
| 23 | 1 | 0 | 0.438980  | 2.555584  | -1.449761 |
| 24 | 1 | 0 | 2.886441  | -0.400740 | -1.006986 |
| 25 | 1 | 0 | 0.951938  | -0.783795 | 1.241306  |
| 26 | 1 | 0 | 3.688290  | -2.033906 | 0.609562  |
| 27 | 1 | 0 | 3.254655  | -0.984451 | 1.949697  |
| 28 | 1 | 0 | 5.664697  | -0.775695 | 0.182374  |
| 29 | 1 | 0 | 5.414546  | -0.112889 | 1.779507  |
| 30 | 1 | 0 | 4.915067  | 1.161586  | -0.885602 |
| 31 | 1 | 0 | 5.141630  | 1.969574  | 0.657275  |
| 32 | 1 | 0 | 0.698002  | -1.117005 | -1.797007 |
| 33 | 1 | 0 | 0.102671  | -2.972351 | 0.572447  |
| 34 | 1 | 0 | -0.155208 | -3.135374 | -2.536943 |
| 35 | 1 | 0 | -1.917792 | 1.269517  | 1.693080  |
| 36 | 1 | 0 | -1.332322 | 0.492438  | -1.201660 |
| 37 | 1 | 0 | -6.241591 | 0.960731  | 1.872761  |
| 38 | 1 | 0 | -5.880251 | -0.245339 | 0.601856  |
| 39 | 1 | 0 | -6.014875 | 1.469701  | 0.172851  |

-----  
SCF Done: E(RmPW1PW91) = -847.402078008 A.U. after 2 cycles

Zero-point correction= 0.330434 (Hartree/Particle)  
Thermal correction to Energy= 0.349429  
Thermal correction to Enthalpy= 0.350373  
Thermal correction to Gibbs Free Energy= 0.279988  
Sum of electronic and zero-point Energies= -847.071644  
Sum of electronic and thermal Energies= -847.052649  
Sum of electronic and thermal Enthalpies= -847.051705  
Sum of electronic and thermal Free Energies= -847.122090

## REACTANT MP2 (7)

-----  
#6-31g\* mp2 nopop guess=read geom=check opt(readfc)  
-----

|   |   |   |           |           |           |
|---|---|---|-----------|-----------|-----------|
| 1 | 6 | 0 | 2.645240  | -2.110581 | -0.720342 |
| 2 | 6 | 0 | -0.334373 | -1.769625 | -0.349851 |
| 3 | 6 | 0 | 1.880874  | -2.827206 | 0.133714  |
| 4 | 6 | 0 | 0.492861  | -2.508259 | 0.435437  |
| 5 | 6 | 0 | 3.155908  | 0.385263  | 0.621803  |
| 6 | 6 | 0 | 2.203034  | 1.173924  | 0.075443  |
| 7 | 6 | 0 | 4.506346  | 0.111287  | 0.030345  |
| 8 | 6 | 0 | 4.907398  | -1.371456 | 0.072135  |
| 9 | 6 | 0 | 4.122192  | -2.278835 | -0.895284 |

|    |   |   |           |           |           |
|----|---|---|-----------|-----------|-----------|
| 10 | 6 | 0 | 0.909243  | 1.379737  | 0.687379  |
| 11 | 6 | 0 | -0.086924 | 2.134331  | 0.163502  |
| 12 | 6 | 0 | -1.377355 | 2.250942  | 0.841543  |
| 13 | 8 | 0 | -2.318559 | 2.921820  | 0.414307  |
| 14 | 6 | 0 | -2.384751 | -0.435142 | -0.614213 |
| 15 | 6 | 0 | -1.618095 | -1.293904 | 0.095187  |
| 16 | 6 | 0 | -3.611978 | 0.130698  | -0.022846 |
| 17 | 8 | 0 | -4.004938 | -0.065813 | 1.120274  |
| 18 | 8 | 0 | -4.237966 | 0.934012  | -0.911964 |
| 19 | 6 | 0 | -5.344097 | 1.671777  | -0.353132 |
| 20 | 1 | 0 | 2.184216  | -1.285552 | -1.257045 |
| 21 | 1 | 0 | -0.004349 | -1.463748 | -1.342901 |
| 22 | 1 | 0 | 2.344445  | -3.629573 | 0.709607  |
| 23 | 1 | 0 | 0.110124  | -2.849270 | 1.398961  |
| 24 | 1 | 0 | 2.949443  | -0.081272 | 1.587494  |
| 25 | 1 | 0 | 2.388370  | 1.656440  | -0.885849 |
| 26 | 1 | 0 | 5.258765  | 0.677749  | 0.598484  |
| 27 | 1 | 0 | 4.548129  | 0.488470  | -1.000095 |
| 28 | 1 | 0 | 4.762541  | -1.745103 | 1.093908  |
| 29 | 1 | 0 | 5.978986  | -1.460204 | -0.146813 |
| 30 | 1 | 0 | 4.415042  | -3.320785 | -0.716051 |
| 31 | 1 | 0 | 4.407776  | -2.037623 | -1.926900 |
| 32 | 1 | 0 | 0.727559  | 0.866987  | 1.634828  |
| 33 | 1 | 0 | 0.030760  | 2.670640  | -0.776700 |
| 34 | 1 | 0 | -1.472253 | 1.682398  | 1.790030  |
| 35 | 1 | 0 | -2.105125 | -0.100422 | -1.609846 |
| 36 | 1 | 0 | -1.964819 | -1.583587 | 1.088040  |
| 37 | 1 | 0 | -5.746370 | 2.247603  | -1.184384 |
| 38 | 1 | 0 | -4.975509 | 2.330084  | 0.434020  |
| 39 | 1 | 0 | -6.094784 | 0.989810  | 0.048714  |

-----  
SCF Done: E(RHF) = -842.036390688 A.U. after 1 cycles

E2 = -0.2578739123D+01 EUMP2 = -0.84461512981037D+03

|                      |          |          |     |
|----------------------|----------|----------|-----|
| Maximum Force        | 0.000018 | 0.000450 | YES |
| RMS Force            | 0.000004 | 0.000300 | YES |
| Maximum Displacement | 0.001421 | 0.001800 | YES |
| RMS Displacement     | 0.000339 | 0.001200 | YES |

## TS MP2 (6)

-----  
#6-31g\* mp2 nopop opt(TS,noeigentest,READFC) guess=read geom=check  
-----

|   |   |   |          |           |           |
|---|---|---|----------|-----------|-----------|
| 1 | 6 | 0 | 3.501214 | 1.457319  | 0.057896  |
| 2 | 6 | 0 | 0.576438 | 1.763076  | -0.349635 |
| 3 | 6 | 0 | 2.925221 | 2.091506  | -1.045400 |
| 4 | 6 | 0 | 1.539513 | 2.192954  | -1.253106 |
| 5 | 6 | 0 | 3.162207 | -0.635942 | -0.299809 |
| 6 | 6 | 0 | 1.892384 | -0.975930 | 0.169349  |
| 7 | 6 | 0 | 4.425758 | -0.975614 | 0.451513  |

|    |   |   |           |           |           |
|----|---|---|-----------|-----------|-----------|
| 8  | 6 | 0 | 5.523496  | -0.004911 | 0.034906  |
| 9  | 6 | 0 | 4.997586  | 1.420842  | 0.273273  |
| 10 | 6 | 0 | 0.773061  | -1.211534 | -0.661136 |
| 11 | 6 | 0 | -0.467597 | -1.614074 | -0.226929 |
| 12 | 6 | 0 | -1.514310 | -1.947993 | -1.181733 |
| 13 | 8 | 0 | -2.599175 | -2.455262 | -0.883777 |
| 14 | 6 | 0 | -1.637663 | 0.881096  | 0.110044  |
| 15 | 6 | 0 | -0.781830 | 1.586335  | -0.690235 |
| 16 | 6 | 0 | -3.008380 | 0.573318  | -0.332734 |
| 17 | 8 | 0 | -3.471871 | 0.832214  | -1.436580 |
| 18 | 8 | 0 | -3.686657 | -0.067507 | 0.645960  |
| 19 | 6 | 0 | -4.987223 | -0.543477 | 0.239623  |
| 20 | 1 | 0 | 2.903631  | 1.409894  | 0.965717  |
| 21 | 1 | 0 | 0.876066  | 1.488008  | 0.661030  |
| 22 | 1 | 0 | 3.585022  | 2.366288  | -1.870028 |
| 23 | 1 | 0 | 1.192325  | 2.545298  | -2.225502 |
| 24 | 1 | 0 | 3.272568  | -0.626050 | -1.387480 |
| 25 | 1 | 0 | 1.763208  | -1.115718 | 1.246720  |
| 26 | 1 | 0 | 4.718444  | -2.011690 | 0.233439  |
| 27 | 1 | 0 | 4.243933  | -0.916234 | 1.533047  |
| 28 | 1 | 0 | 5.726607  | -0.143283 | -1.034192 |
| 29 | 1 | 0 | 6.464641  | -0.186249 | 0.565946  |
| 30 | 1 | 0 | 5.499634  | 2.136910  | -0.387352 |
| 31 | 1 | 0 | 5.216932  | 1.726617  | 1.303013  |
| 32 | 1 | 0 | 0.914640  | -1.067136 | -1.735761 |
| 33 | 1 | 0 | -0.660622 | -1.833932 | 0.822033  |
| 34 | 1 | 0 | -1.274920 | -1.711868 | -2.241904 |
| 35 | 1 | 0 | -1.363989 | 0.607880  | 1.125314  |
| 36 | 1 | 0 | -1.130687 | 1.872656  | -1.683194 |
| 37 | 1 | 0 | -5.394532 | -1.032526 | 1.122399  |
| 38 | 1 | 0 | -4.873613 | -1.252402 | -0.580147 |
| 39 | 1 | 0 | -5.617875 | 0.291679  | -0.069230 |

-----  
SCF Done: E(RHF) = -841.973033111 A.U. after 8 cycles

E2 = -0.2626106461D+01 EUMP2 = -0.84459913957242D+03

|                      |          |          |     |
|----------------------|----------|----------|-----|
| Maximum Force        | 0.000039 | 0.000450 | YES |
| RMS Force            | 0.000006 | 0.000300 | YES |
| Maximum Displacement | 0.000513 | 0.001800 | YES |
| RMS Displacement     | 0.000116 | 0.001200 | YES |

## PRODUCT MP2 (8)

-----  
#6-31g\* b3lyp nopop freq(noraman)  
-----

|   |   |   |          |          |           |
|---|---|---|----------|----------|-----------|
| 1 | 6 | 0 | 3.106629 | 1.264254 | 0.245461  |
| 2 | 6 | 0 | 0.383297 | 0.996562 | 0.098233  |
| 3 | 6 | 0 | 2.396779 | 2.100775 | -0.771114 |
| 4 | 6 | 0 | 1.067082 | 1.922056 | -0.880421 |

|    |   |   |           |           |           |
|----|---|---|-----------|-----------|-----------|
| 5  | 6 | 0 | 2.651367  | -0.194868 | 0.071345  |
| 6  | 6 | 0 | 1.130603  | -0.385623 | 0.214924  |
| 7  | 6 | 0 | 3.569078  | -0.954915 | 1.027638  |
| 8  | 6 | 0 | 4.926173  | -0.210751 | 0.910941  |
| 9  | 6 | 0 | 4.627514  | 1.130316  | 0.185965  |
| 10 | 6 | 0 | 0.649466  | -1.360238 | -0.810636 |
| 11 | 6 | 0 | 0.141141  | -2.579079 | -0.548441 |
| 12 | 6 | 0 | -0.265455 | -3.475451 | -1.636978 |
| 13 | 8 | 0 | -0.718261 | -4.604461 | -1.464755 |
| 14 | 6 | 0 | -2.057804 | 0.979713  | 0.683342  |
| 15 | 6 | 0 | -1.067354 | 0.800340  | -0.204609 |
| 16 | 6 | 0 | -3.463150 | 0.741491  | 0.287974  |
| 17 | 8 | 0 | -3.850105 | 0.414655  | -0.824590 |
| 18 | 8 | 0 | -4.291518 | 0.936359  | 1.345289  |
| 19 | 6 | 0 | -5.684296 | 0.717752  | 1.044133  |
| 20 | 1 | 0 | 2.818274  | 1.584769  | 1.262123  |
| 21 | 1 | 0 | 0.465075  | 1.451275  | 1.098363  |
| 22 | 1 | 0 | 2.943765  | 2.778743  | -1.424822 |
| 23 | 1 | 0 | 0.468378  | 2.460437  | -1.613072 |
| 24 | 1 | 0 | 2.934894  | -0.461732 | -0.958257 |
| 25 | 1 | 0 | 0.896132  | -0.785428 | 1.211753  |
| 26 | 1 | 0 | 3.644806  | -2.020888 | 0.789244  |
| 27 | 1 | 0 | 3.173913  | -0.878118 | 2.048177  |
| 28 | 1 | 0 | 5.655719  | -0.801883 | 0.349371  |
| 29 | 1 | 0 | 5.359758  | -0.037089 | 1.900485  |
| 30 | 1 | 0 | 4.941602  | 1.076813  | -0.863486 |
| 31 | 1 | 0 | 5.149315  | 1.980462  | 0.637023  |
| 32 | 1 | 0 | 0.756718  | -1.049947 | -1.854456 |
| 33 | 1 | 0 | 0.014792  | -2.944389 | 0.469004  |
| 34 | 1 | 0 | -0.135867 | -3.064117 | -2.660947 |
| 35 | 1 | 0 | -1.870254 | 1.295347  | 1.706422  |
| 36 | 1 | 0 | -1.343261 | 0.483789  | -1.211029 |
| 37 | 1 | 0 | -6.209093 | 0.908663  | 1.978069  |
| 38 | 1 | 0 | -5.843845 | -0.308755 | 0.710726  |
| 39 | 1 | 0 | -6.016365 | 1.404121  | 0.263725  |

-----  
SCF Done: E(RHF) = -842.066546261 A.U. after 11 cycles

E2 = -0.2585018132D+01 EUMP2 = -0.84465156439327D+03

|                      |          |          |     |
|----------------------|----------|----------|-----|
| Maximum Force        | 0.000014 | 0.000450 | YES |
| RMS Force            | 0.000002 | 0.000300 | YES |
| Maximum Displacement | 0.001019 | 0.001800 | YES |
| RMS Displacement     | 0.000230 | 0.001200 | YES |

### REACTANT C-CH=O CONF. DFT (S1)

-----  
#b3lyp 6-31g\* freq(noraman) guess=read geom=check nopop  
-----

|    |   |   |           |           |           |
|----|---|---|-----------|-----------|-----------|
| 1  | 6 | 0 | 2.473781  | -2.099282 | -0.614483 |
| 2  | 6 | 0 | -0.536236 | -1.637833 | -0.063636 |
| 3  | 6 | 0 | 1.566593  | -3.011260 | -0.215758 |
| 4  | 6 | 0 | 0.122138  | -2.819889 | -0.149295 |
| 5  | 6 | 0 | 3.444102  | 0.597154  | 0.699880  |
| 6  | 6 | 0 | 2.923587  | 1.560346  | -0.087673 |
| 7  | 6 | 0 | 4.767173  | -0.078650 | 0.497483  |
| 8  | 6 | 0 | 4.716224  | -1.621465 | 0.552870  |
| 9  | 6 | 0 | 3.961669  | -2.320728 | -0.605540 |
| 10 | 6 | 0 | 1.611808  | 2.123498  | 0.128556  |
| 11 | 6 | 0 | 1.012773  | 3.049593  | -0.655491 |
| 12 | 6 | 0 | -0.356369 | 3.507931  | -0.381008 |
| 13 | 8 | 0 | -1.080725 | 3.053516  | 0.492479  |
| 14 | 6 | 0 | -2.670754 | -0.391296 | 0.110592  |
| 15 | 6 | 0 | -1.974097 | -1.542360 | -0.010571 |
| 16 | 6 | 0 | -4.144306 | -0.425173 | 0.153683  |
| 17 | 8 | 0 | -4.840163 | -1.424183 | 0.095522  |
| 18 | 8 | 0 | -4.654997 | 0.826502  | 0.268180  |
| 19 | 6 | 0 | -6.084422 | 0.898540  | 0.324103  |
| 20 | 1 | 0 | 2.125762  | -1.130138 | -0.963464 |
| 21 | 1 | 0 | 0.024720  | -0.705379 | -0.014386 |
| 22 | 1 | 0 | 1.923600  | -4.001197 | 0.073130  |
| 23 | 1 | 0 | -0.476775 | -3.731054 | -0.142210 |
| 24 | 1 | 0 | 2.862688  | 0.263160  | 1.561277  |
| 25 | 1 | 0 | 3.486468  | 1.910500  | -0.953570 |
| 26 | 1 | 0 | 5.450657  | 0.252574  | 1.295445  |
| 27 | 1 | 0 | 5.215398  | 0.250192  | -0.449524 |
| 28 | 1 | 0 | 4.272180  | -1.935957 | 1.506620  |
| 29 | 1 | 0 | 5.750345  | -1.989562 | 0.554531  |
| 30 | 1 | 0 | 4.164700  | -3.396981 | -0.534492 |
| 31 | 1 | 0 | 4.394320  | -1.981052 | -1.558323 |
| 32 | 1 | 0 | 1.042271  | 1.755319  | 0.982271  |
| 33 | 1 | 0 | 1.524495  | 3.478351  | -1.515431 |
| 34 | 1 | 0 | -0.723373 | 4.323914  | -1.039510 |
| 35 | 1 | 0 | -2.187346 | 0.579491  | 0.186806  |
| 36 | 1 | 0 | -2.543322 | -2.469666 | -0.069876 |
| 37 | 1 | 0 | -6.321746 | 1.959451  | 0.412882  |
| 38 | 1 | 0 | -6.466415 | 0.346705  | 1.187959  |
| 39 | 1 | 0 | -6.529673 | 0.479923  | -0.583227 |

-----  
SCF Done: E(RB3LYP) = -847.343943626 A.U. after 1 cycles

Frequencies -- 20.4892 25.1475 32.0135

Zero-point correction= 0.325971 (Hartree/Particle)  
Thermal correction to Energy= 0.347201  
Thermal correction to Enthalpy= 0.348145  
Thermal correction to Gibbs Free Energy= 0.272126  
Sum of electronic and zero-point Energies= -847.017973  
Sum of electronic and thermal Energies= -846.996743  
Sum of electronic and thermal Enthalpies= -846.995798  
Sum of electronic and thermal Free Energies= -847.071818

SCF Done: E(RmPW1PW91) = -847.372306

## TS DFT Conf. (C-CH=O)(9)

-----  
#b3lyp 6-31g\* freq(noraman) guess=read geom=check nopop  
-----

|    |   |   |           |           |           |
|----|---|---|-----------|-----------|-----------|
| 1  | 6 | 0 | 3.702157  | -0.544037 | 0.080948  |
| 2  | 6 | 0 | 0.902095  | -1.478217 | 0.561404  |
| 3  | 6 | 0 | 3.249828  | -1.178801 | 1.264283  |
| 4  | 6 | 0 | 1.932114  | -1.581304 | 1.490508  |
| 5  | 6 | 0 | 3.039015  | 1.295880  | 0.080049  |
| 6  | 6 | 0 | 1.691060  | 1.353437  | -0.352033 |
| 7  | 6 | 0 | 4.153376  | 1.811615  | -0.826479 |
| 8  | 6 | 0 | 5.468628  | 1.196252  | -0.346599 |
| 9  | 6 | 0 | 5.200341  | -0.312341 | -0.137088 |
| 10 | 6 | 0 | 0.584644  | 1.626836  | 0.473673  |
| 11 | 6 | 0 | -0.718758 | 1.747327  | 0.049118  |
| 12 | 6 | 0 | -1.791221 | 2.081580  | 0.979850  |
| 13 | 8 | 0 | -1.640713 | 2.307895  | 2.175074  |
| 14 | 6 | 0 | -1.480420 | -1.237641 | 0.061227  |
| 15 | 6 | 0 | -0.468002 | -1.592355 | 0.902576  |
| 16 | 6 | 0 | -2.885180 | -1.310332 | 0.497912  |
| 17 | 8 | 0 | -3.276445 | -1.725733 | 1.572790  |
| 18 | 8 | 0 | -3.718547 | -0.849467 | -0.472068 |
| 19 | 6 | 0 | -5.112857 | -0.878106 | -0.136077 |
| 20 | 1 | 0 | 3.183163  | -0.837636 | -0.829391 |
| 21 | 1 | 0 | 1.137373  | -1.257333 | -0.475699 |
| 22 | 1 | 0 | 3.934259  | -1.204282 | 2.111437  |
| 23 | 1 | 0 | 1.667623  | -1.902399 | 2.497249  |
| 24 | 1 | 0 | 3.183042  | 1.573161  | 1.126105  |
| 25 | 1 | 0 | 1.502909  | 1.226816  | -1.420686 |
| 26 | 1 | 0 | 4.183913  | 2.908169  | -0.795911 |
| 27 | 1 | 0 | 3.943855  | 1.526675  | -1.866516 |
| 28 | 1 | 0 | 5.751856  | 1.656867  | 0.608418  |
| 29 | 1 | 0 | 6.293147  | 1.379135  | -1.043753 |
| 30 | 1 | 0 | 5.776613  | -0.698331 | 0.710877  |
| 31 | 1 | 0 | 5.519450  | -0.880824 | -1.018928 |
| 32 | 1 | 0 | 0.760993  | 1.767439  | 1.539710  |
| 33 | 1 | 0 | -0.975792 | 1.645933  | -1.003359 |
| 34 | 1 | 0 | -2.805579 | 2.123512  | 0.526245  |
| 35 | 1 | 0 | -1.290273 | -0.938425 | -0.963725 |
| 36 | 1 | 0 | -0.733920 | -1.880875 | 1.918328  |
| 37 | 1 | 0 | -5.633035 | -0.475526 | -1.006182 |
| 38 | 1 | 0 | -5.309380 | -0.264493 | 0.747456  |
| 39 | 1 | 0 | -5.440071 | -1.901849 | 0.066704  |

-----  
SCF Done: E(RB3LYP) = -847.309580047 A.U. after 1 cycles

Frequencies -- -421.6272 30.0756 38.4409

Zero-point correction= 0.326437 (Hartree/Particle)  
Thermal correction to Energy= 0.345828  
Thermal correction to Enthalpy= 0.346772  
Thermal correction to Gibbs Free Energy= 0.277432

Sum of electronic and zero-point Energies= -846.983143  
Sum of electronic and thermal Energies= -846.963753  
Sum of electronic and thermal Enthalpies= -846.962808  
Sum of electronic and thermal Free Energies= -847.032148

SCF Done: E(RmPW1PW91) = **-847.3425276**

**PRODUCT - C-CH=O CONF DFT (S2)**

-----  
#b3lyp 6-31g\* freq(noraman) guess=read geom=check nopop  
-----

-----  
1 6 0 3.109656 -1.299684 0.005837  
2 6 0 0.357956 -0.963276 0.077610  
3 6 0 2.358170 -1.950891 1.131629  
4 6 0 1.038080 -1.738010 1.194696  
5 6 0 2.670942 0.181670 -0.093569  
6 6 0 1.145537 0.370496 -0.305228  
7 6 0 3.634739 0.760832 -1.140810  
8 6 0 4.977882 0.010876 -0.880291  
9 6 0 4.639657 -1.181607 0.067335  
10 6 0 0.675278 1.561778 0.476163  
11 6 0 0.173507 2.695039 -0.040532  
12 6 0 -0.224750 3.828469 0.820758  
13 8 0 -0.100328 3.858343 2.032435  
14 6 0 -2.100123 -1.089342 -0.449600  
15 6 0 -1.097394 -0.707986 0.350584  
16 6 0 -3.508606 -0.797200 -0.097847  
17 8 0 -3.892254 -0.230286 0.906507  
18 8 0 -4.345714 -1.253341 -1.062867  
19 6 0 -5.740248 -1.017924 -0.820594  
20 1 0 2.838347 -1.792048 -0.945127  
21 1 0 0.421657 -1.583611 -0.828854  
22 1 0 2.882374 -2.531744 1.888170  
23 1 0 0.425416 -2.147222 1.994720  
24 1 0 2.929124 0.622898 0.880028  
25 1 0 0.940415 0.548526 -1.368212  
26 1 0 3.736487 1.848449 -1.066410  
27 1 0 3.263179 0.541124 -2.150328  
28 1 0 5.721660 0.671606 -0.423584  
29 1 0 5.411720 -0.342769 -1.821424  
30 1 0 4.946743 -0.951117 1.095536  
31 1 0 5.150178 -2.106458 -0.221233  
32 1 0 0.777999 1.511260 1.561323  
33 1 0 0.038116 2.815439 -1.114535  
34 1 0 -0.663420 4.695867 0.280906  
35 1 0 -1.924999 -1.623550 -1.379942  
36 1 0 -1.355599 -0.178370 1.267053  
37 1 0 -6.262981 -1.438892 -1.680199  
38 1 0 -5.940765 0.053696 -0.735423  
39 1 0 -6.059744 -1.509900 0.102289  
-----



SCF Done: E(RB3LYP) = -847.352544035 A.U. after 1 cycles

Frequencies -- 17.9165 26.4636 43.9703

Zero-point correction= 0.330540 (Hartree/Particle)  
Thermal correction to Energy= 0.349584  
Thermal correction to Enthalpy= 0.350528  
Thermal correction to Gibbs Free Energy= 0.280238  
Sum of electronic and zero-point Energies= -847.022004  
Sum of electronic and thermal Energies= -847.002960  
Sum of electronic and thermal Enthalpies= -847.002016  
Sum of electronic and thermal Free Energies= -847.072306

SCF Done: E(RmPW1PW91) = -847.3963208

## C21 TS DFT (12)

-----  
#6-31g\* b3lyp guess=read geom=check nopop FREQ(NORAMAN)  
-----

-----

|    |   |   |           |           |           |
|----|---|---|-----------|-----------|-----------|
| 1  | 6 | 0 | 4.354973  | -0.972703 | -0.069757 |
| 2  | 6 | 0 | 1.518010  | -1.721799 | 0.404697  |
| 3  | 6 | 0 | 3.846809  | -1.442261 | 1.168487  |
| 4  | 6 | 0 | 2.503575  | -1.756255 | 1.384104  |
| 5  | 6 | 0 | 3.771967  | 0.826566  | -0.347614 |
| 6  | 6 | 0 | 2.401849  | 0.917689  | -0.705336 |
| 7  | 6 | 0 | 4.843347  | 1.124404  | -1.398089 |
| 8  | 6 | 0 | 6.170966  | 0.569569  | -0.874143 |
| 9  | 6 | 0 | 5.865746  | -0.823615 | -0.267577 |
| 10 | 6 | 0 | 1.397353  | 1.464780  | 0.125548  |
| 11 | 6 | 0 | 0.114774  | 1.765463  | -0.248882 |
| 12 | 6 | 0 | -0.806143 | 2.415268  | 0.698115  |
| 13 | 8 | 0 | -0.467792 | 2.696718  | 1.847066  |
| 14 | 6 | 0 | -0.853393 | -1.683271 | -0.234049 |
| 15 | 6 | 0 | 0.128663  | -1.841435 | 0.692367  |
| 16 | 6 | 0 | -2.272769 | -1.856256 | 0.115057  |
| 17 | 8 | 0 | -2.704019 | -2.147157 | 1.216196  |
| 18 | 8 | 0 | -3.051269 | -1.654268 | -0.984710 |
| 19 | 6 | 0 | -4.472327 | -1.882825 | -0.870170 |
| 20 | 6 | 0 | -3.067199 | 1.413366  | 0.156068  |
| 21 | 6 | 0 | -4.548419 | 1.668095  | -0.141767 |
| 22 | 6 | 0 | -5.451082 | 0.423312  | -0.063901 |
| 23 | 6 | 0 | -5.294344 | -0.632087 | -1.187884 |
| 24 | 6 | 0 | -2.224845 | 2.703001  | 0.217110  |
| 25 | 1 | 0 | 3.861206  | -1.383241 | -0.950224 |
| 26 | 1 | 0 | 1.798876  | -1.632901 | -0.639914 |
| 27 | 1 | 0 | 4.501464  | -1.390609 | 2.037267  |
| 28 | 1 | 0 | 2.186367  | -1.954901 | 2.407085  |
| 29 | 1 | 0 | 4.001311  | 1.278626  | 0.619902  |
| 30 | 1 | 0 | 2.128343  | 0.657266  | -1.729747 |
| 31 | 1 | 0 | 4.899775  | 2.203482  | -1.586656 |
| 32 | 1 | 0 | 4.565749  | 0.648134  | -2.348161 |
| 33 | 1 | 0 | 6.555783  | 1.237077  | -0.093381 |

-----

|    |   |   |           |           |           |
|----|---|---|-----------|-----------|-----------|
| 34 | 1 | 0 | 6.936395  | 0.526033  | -1.655918 |
| 35 | 1 | 0 | 6.389625  | -0.958439 | 0.685149  |
| 36 | 1 | 0 | 6.215470  | -1.622186 | -0.932880 |
| 37 | 1 | 0 | 1.667149  | 1.718919  | 1.150513  |
| 38 | 1 | 0 | -0.229085 | 1.572996  | -1.263208 |
| 39 | 1 | 0 | -0.622669 | -1.472366 | -1.273877 |
| 40 | 1 | 0 | -0.173540 | -2.037196 | 1.720326  |
| 41 | 1 | 0 | -4.695453 | -2.664825 | -1.604513 |
| 42 | 1 | 0 | -4.689032 | -2.263917 | 0.130556  |
| 43 | 1 | 0 | -2.979209 | 0.889004  | 1.116906  |
| 44 | 1 | 0 | -2.649330 | 0.744606  | -0.602435 |
| 45 | 1 | 0 | -4.653328 | 2.131813  | -1.134364 |
| 46 | 1 | 0 | -4.928649 | 2.406434  | 0.578178  |
| 47 | 1 | 0 | -6.490336 | 0.775983  | -0.079967 |
| 48 | 1 | 0 | -5.315686 | -0.060621 | 0.913310  |
| 49 | 1 | 0 | -4.899165 | -0.169222 | -2.102243 |
| 50 | 1 | 0 | -6.293454 | -1.005157 | -1.451338 |
| 51 | 1 | 0 | -2.200701 | 3.175395  | -0.775560 |
| 52 | 1 | 0 | -2.668300 | 3.413432  | 0.922482  |

-----  
SCF Done: E(RB3LYP) = -1042.67949021 A.U. after 1 cycles

Frequencies -- -403.0844 14.0335 35.2049

Zero-point correction= 0.450555 (Hartree/Particle)  
Thermal correction to Energy= 0.474074  
Thermal correction to Enthalpy= 0.475018  
Thermal correction to Gibbs Free Energy= 0.396528  
Sum of electronic and zero-point Energies= -1042.228935  
Sum of electronic and thermal Energies= -1042.205417  
Sum of electronic and thermal Enthalpies= -1042.204472  
Sum of electronic and thermal Free Energies= -1042.282962

SCF Done: E(RmPW1PW91) = -1042.722165 A.U. after 15 cycles

### C21 - Reactant - DFT (13)

-----  
#6-31g\* b3lyp nopop freq(noraman)  
-----

|    |   |   |           |           |           |
|----|---|---|-----------|-----------|-----------|
| 1  | 6 | 0 | -4.198203 | 1.356193  | -0.560376 |
| 2  | 6 | 0 | -1.252345 | 2.165594  | -0.229715 |
| 3  | 6 | 0 | -3.737220 | 2.477445  | 0.027133  |
| 4  | 6 | 0 | -2.337194 | 2.798160  | 0.281679  |
| 5  | 6 | 0 | -4.200846 | -1.673101 | 0.470596  |
| 6  | 6 | 0 | -3.112428 | -2.115037 | -0.189353 |
| 7  | 6 | 0 | -5.576545 | -1.509096 | -0.106781 |
| 8  | 6 | 0 | -6.203910 | -0.111629 | 0.107701  |
| 9  | 6 | 0 | -5.647890 | 1.031021  | -0.778640 |
| 10 | 6 | 0 | -1.799048 | -2.191547 | 0.413668  |
| 11 | 6 | 0 | -0.653129 | -2.465114 | -0.245865 |
| 12 | 6 | 0 | 0.662403  | -2.397428 | 0.439336  |

|    |   |   |           |           |           |
|----|---|---|-----------|-----------|-----------|
| 13 | 8 | 0 | 0.755421  | -2.283286 | 1.654982  |
| 14 | 6 | 0 | 1.188424  | 1.820779  | -0.315505 |
| 15 | 6 | 0 | 0.102677  | 2.485159  | 0.138596  |
| 16 | 6 | 0 | 2.539065  | 2.143320  | 0.173003  |
| 17 | 8 | 0 | 2.827325  | 3.040592  | 0.943968  |
| 18 | 8 | 0 | 3.454457  | 1.274457  | -0.336716 |
| 19 | 6 | 0 | 4.800876  | 1.418260  | 0.162287  |
| 20 | 6 | 0 | 3.156777  | -1.877606 | 0.203826  |
| 21 | 6 | 0 | 4.340090  | -1.792151 | -0.770096 |
| 22 | 6 | 0 | 5.586585  | -1.062991 | -0.216507 |
| 23 | 6 | 0 | 5.719978  | 0.436670  | -0.553558 |
| 24 | 6 | 0 | 1.895308  | -2.437541 | -0.458160 |
| 25 | 1 | 0 | -3.485259 | 0.601678  | -0.882597 |
| 26 | 1 | 0 | -1.385628 | 1.350027  | -0.939069 |
| 27 | 1 | 0 | -4.461878 | 3.212130  | 0.379708  |
| 28 | 1 | 0 | -2.159766 | 3.629046  | 0.964659  |
| 29 | 1 | 0 | -4.090767 | -1.398036 | 1.521348  |
| 30 | 1 | 0 | -3.196909 | -2.385564 | -1.243038 |
| 31 | 1 | 0 | -6.241039 | -2.240620 | 0.379236  |
| 32 | 1 | 0 | -5.571712 | -1.760259 | -1.176013 |
| 33 | 1 | 0 | -6.100875 | 0.172445  | 1.163436  |
| 34 | 1 | 0 | -7.280820 | -0.189729 | -0.089324 |
| 35 | 1 | 0 | -6.255627 | 1.927283  | -0.599319 |
| 36 | 1 | 0 | -5.803148 | 0.752821  | -1.832500 |
| 37 | 1 | 0 | -1.716262 | -1.963058 | 1.476127  |
| 38 | 1 | 0 | -0.663118 | -2.675007 | -1.314682 |
| 39 | 1 | 0 | 1.097121  | 0.997820  | -1.018615 |
| 40 | 1 | 0 | 0.263862  | 3.293812  | 0.850622  |
| 41 | 1 | 0 | 5.124964  | 2.450011  | -0.008564 |
| 42 | 1 | 0 | 4.794580  | 1.252390  | 1.246142  |
| 43 | 1 | 0 | 3.422693  | -2.499305 | 1.067057  |
| 44 | 1 | 0 | 2.928186  | -0.884874 | 0.600722  |
| 45 | 1 | 0 | 4.017954  | -1.295294 | -1.695862 |
| 46 | 1 | 0 | 4.625135  | -2.813082 | -1.061194 |
| 47 | 1 | 0 | 6.482777  | -1.552138 | -0.619485 |
| 48 | 1 | 0 | 5.640913  | -1.197185 | 0.873667  |
| 49 | 1 | 0 | 5.614424  | 0.583153  | -1.637166 |
| 50 | 1 | 0 | 6.743524  | 0.748883  | -0.302808 |
| 51 | 1 | 0 | 1.671434  | -1.885542 | -1.382946 |
| 52 | 1 | 0 | 2.047078  | -3.482057 | -0.777032 |

-----  
SCF Done: E(RB3LYP) = -1042.71688523 A.U. after 15 cycles

Frequencies -- 28.1880 29.9404 35.8439

Zero-point correction= 0.449686  
(Hartree/Particle)

Thermal correction to Energy= 0.474991

Thermal correction to Enthalpy= 0.475935

Thermal correction to Gibbs Free Energy= 0.392498

Sum of electronic and zero-point Energies= -1042.267199

Sum of electronic and thermal Energies= -1042.241894

Sum of electronic and thermal Enthalpies= -1042.240950

Sum of electronic and thermal Free Energies= -1042.324387

SCF Done: E(RmPW1PW91) = -1042.75570757 A.U. after 15 cycles

## C21 DFT PRODUCT (14)

-----  
#6-31G\* B3LYP FREQ(NORAMAN) GUESS=READ GEOM=CHECK nopop  
-----

|    |   |   |           |           |           |
|----|---|---|-----------|-----------|-----------|
| 1  | 6 | 0 | 4.408443  | -0.917846 | -0.076816 |
| 2  | 6 | 0 | 1.663423  | -1.403650 | 0.151414  |
| 3  | 6 | 0 | 3.926616  | -1.727440 | 1.093206  |
| 4  | 6 | 0 | 2.606917  | -1.903505 | 1.228182  |
| 5  | 6 | 0 | 3.540592  | 0.358617  | -0.187733 |
| 6  | 6 | 0 | 2.036434  | 0.072590  | -0.379689 |
| 7  | 6 | 0 | 4.265036  | 1.180969  | -1.266493 |
| 8  | 6 | 0 | 5.776764  | 0.871557  | -1.040334 |
| 9  | 6 | 0 | 5.835683  | -0.348781 | -0.071578 |
| 10 | 6 | 0 | 1.194611  | 1.138641  | 0.260623  |
| 11 | 6 | 0 | 0.145846  | 1.744339  | -0.314014 |
| 12 | 6 | 0 | -0.717441 | 2.689770  | 0.447591  |
| 13 | 8 | 0 | -0.323863 | 3.256020  | 1.457444  |
| 14 | 6 | 0 | -0.771496 | -1.880530 | -0.282672 |
| 15 | 6 | 0 | 0.215539  | -1.513759 | 0.543550  |
| 16 | 6 | 0 | -2.185644 | -1.880292 | 0.158068  |
| 17 | 8 | 0 | -2.575106 | -1.814034 | 1.308441  |
| 18 | 8 | 0 | -3.001270 | -1.944192 | -0.924934 |
| 19 | 6 | 0 | -4.429907 | -2.028266 | -0.712667 |
| 20 | 6 | 0 | -2.916481 | 1.495421  | 0.097471  |
| 21 | 6 | 0 | -4.434962 | 1.637614  | -0.054926 |
| 22 | 6 | 0 | -5.211672 | 0.325585  | 0.166997  |
| 23 | 6 | 0 | -5.152167 | -0.706405 | -0.992419 |
| 24 | 6 | 0 | -2.154438 | 2.833551  | -0.038405 |
| 25 | 1 | 0 | 4.268179  | -1.497671 | -1.006541 |
| 26 | 1 | 0 | 1.815035  | -2.040103 | -0.732954 |
| 27 | 1 | 0 | 4.631270  | -2.109186 | 1.829703  |
| 28 | 1 | 0 | 2.186420  | -2.448068 | 2.071178  |
| 29 | 1 | 0 | 3.661861  | 0.877534  | 0.774231  |
| 30 | 1 | 0 | 1.801894  | 0.054010  | -1.451506 |
| 31 | 1 | 0 | 4.038358  | 2.250369  | -1.205910 |
| 32 | 1 | 0 | 3.950672  | 0.843120  | -2.262838 |
| 33 | 1 | 0 | 6.300683  | 1.732546  | -0.612922 |
| 34 | 1 | 0 | 6.271922  | 0.646701  | -1.990822 |
| 35 | 1 | 0 | 6.092765  | -0.018479 | 0.943030  |
| 36 | 1 | 0 | 6.588180  | -1.086878 | -0.368864 |
| 37 | 1 | 0 | 1.430117  | 1.411106  | 1.290273  |
| 38 | 1 | 0 | -0.159849 | 1.478236  | -1.325005 |
| 39 | 1 | 0 | -0.583831 | -2.138904 | -1.321921 |
| 40 | 1 | 0 | -0.051817 | -1.240337 | 1.563929  |
| 41 | 1 | 0 | -4.758935 | -2.789563 | -1.426376 |
| 42 | 1 | 0 | -4.616861 | -2.383257 | 0.303884  |
| 43 | 1 | 0 | -2.705175 | 1.062750  | 1.083598  |
| 44 | 1 | 0 | -2.534177 | 0.777734  | -0.638611 |
| 45 | 1 | 0 | -4.679046 | 2.048450  | -1.046126 |
| 46 | 1 | 0 | -4.788668 | 2.378062  | 0.675696  |

|    |   |   |           |           |           |
|----|---|---|-----------|-----------|-----------|
| 47 | 1 | 0 | -6.263099 | 0.586640  | 0.339008  |
| 48 | 1 | 0 | -4.860977 | -0.142241 | 1.095369  |
| 49 | 1 | 0 | -4.710097 | -0.259013 | -1.892545 |
| 50 | 1 | 0 | -6.177581 | -0.980434 | -1.273242 |
| 51 | 1 | 0 | -2.167420 | 3.164509  | -1.087149 |
| 52 | 1 | 0 | -2.628085 | 3.610932  | 0.569680  |

-----  
SCF Done: E(RB+HF-LYP) = -1042.72155834 A.U. after 1 cycles

Frequencies -- 18.7200 33.8895  
52.7876

Zero-point correction= 0.454684  
(Hartree/Particle)  
Thermal correction to Energy= 0.477692  
Thermal correction to Enthalpy= 0.478636  
Thermal correction to Gibbs Free Energy= 0.400949  
Sum of electronic and zero-point Energies= -1042.266874  
Sum of electronic and thermal Energies= -1042.243867  
Sum of electronic and thermal Enthalpies= -1042.242923  
Sum of electronic and thermal Free Energies= -1042.320609

SCF Done: E(RmPW1PW91) = -1042.77506855 A.U. after 15 cycles
